## 8 **ABSTRACT**

9 There is an urgent need for accurate, scalable, and cost-efficient models of the  
10 complexity and heterogeneity of the tumor microenvironment. Here, we detail how to  
11 fabricate and use the Metabolic Microenvironment Chamber (MEMIC) – a 3D-printed *ex*  
12 *vivo* model of intratumoral heterogeneity. A major driver of the cellular and molecular  
13 diversity in tumors is the accessibility to the blood stream that provides key resources  
14 such as oxygen and nutrients. While some tumor cells have direct access to these  
15 resources, many others must survive under progressively more ischemic environments  
16 as they reside further from the vasculature. The MEMIC is designed to simulate the  
17 differential access to nutrients and allows co-culturing different cell types, such as tumor  
18 and immune cells. This system is optimized for live imaging and other microscopy-  
19 based approaches and it is a powerful tool to study tumor features such as the effect of  
20 nutrient scarcity on tumor-stroma interactions. Due to its adaptable design and full  
21 experimental control, the MEMIC can provide novel insights into the tumor  
22 microenvironment that would be difficult to obtain via other methods. As a proof of  
23 principle, we show that cells can sense gradual changes in metabolite concentration,  
24 and tune intracellular cell signaling to form multicellular spatial patterns of cell  
25 proliferation. We also show that ischemic macrophages reduce epithelial features in  
26 neighboring tumor cells highlighting the power of this system to study cell-cell  
27 interactions and non-cell autonomous effects of the metabolic microenvironment. We  
28 propose that the MEMIC can be easily adapted to study early development, ischemic  
29 stroke, and other systems where multiple cell types interact within heterogeneous  
30 environments.

## 31 INTRODUCTION

32 The tumor microenvironment is a complex cellular ecosystem (Fig. 1A). This complexity  
33 includes a large diversity of malignant and non-malignant cells such as fibroblasts and  
34 immune cells (Junttila and Sauvage, 2013; Merlo et al., 2006; Tabassum and Polyak,  
35 2015). These cells secrete and consume molecular signals, growth factors, and  
36 metabolites, creating an intricate biochemical landscape in the tumor interstice that in  
37 turn affects tumor cell behaviors and cell-cell interactions (Bader et al., 2020; Buck et  
38 al., 2017; Mehta et al., 2017; Wiseman and Halliwell, 1996).

39 We and others have shown how insufficient tumor vascularization can produce  
40 predictable spatial patterns of cell phenotypes (Carmona-Fontaine et al., 2017b). Cells  
41 located near functional blood vessels are constantly perfused with nutrients and oxygen.  
42 In contrast, cells distant from vasculature, or proximal to faulty vessels commonly found  
43 in solid tumors (Mazzone et al., 2009), are in a microenvironment poor in nutrients and  
44 profuse in potentially toxic metabolic waste products (Carmeliet and Jain, 2000a;  
45 Gatenby and Gillies, 2004; Hobson-Gutierrez and Carmona-Fontaine, 2018a;  
46 Thomlinson, 1977a). The role that nutrients and other metabolites have in modulating  
47 the behavior and phenotypes of tumor – and especially immune cells – has been the  
48 subject of recent interest (Buck et al., 2017; Hobson-Gutierrez and Carmona-Fontaine,  
49 2018a; Olenchock et al., 2017a; Pavlova and Thompson, 2016a). However, the lack of  
50 amenable models of the metabolic microenvironment of tumors hampers the ability to  
51 predict and control the effect of environmental metabolites on tumor cells.

52 Animal models are a fundamental tool to study the complex and heterogeneous tumor

53 microenvironment (Day et al., 2015; Gould et al., 2015). However, the complexity of  
54 animal physiology – while crucial in pre-clinical studies – can challenge the isolation of  
55 individual experimental variables, and their use for large experiments is severely limited  
56 by practical, economical, and ethical concerns (Bert et al., 2017; Bressers et al., 2019).  
57 On the other side of the spectrum, conventional *in vitro* experiments offer much better  
58 experimental control and can be easily used in high throughput approaches. However,  
59 these cultures do not model the metabolic heterogeneity and other essential features of  
60 the tumor microenvironment. The recent resurgence in the use of three-dimensional  
61 tumor organoids – or *tumoroids* – as a tool to model different aspects of tumor biology  
62 does offer some of these features (Clevers, 2016). Tumoroids can recapitulate key  
63 histopathological tumor characteristics, and they can be used to screen for patient-  
64 specific drug responses (Boj et al., 2015; Gao et al., 2014; van de Wetering et al.,  
65 2015). However, the organization of tumoroids emerges spontaneously and thus the  
66 visualization, quantification, and prediction of their organization remains challenging  
67 (Fig. 1B).

68 We previously developed a microphysiological system that mimics the complexity of the  
69 tumor microenvironment in a well-controlled and predictable manner. This Metabolic  
70 Microenvironment Chamber (MEMIC) is suitable for high resolution microscopy  
71 analyses and can be easily adapted to the complexity and throughput that different  
72 experimental scenarios may need (Carmona-Fontaine et al., 2017b). Cells in the  
73 MEMIC are gradually limited in their access to fresh media, generating gradients of  
74 extracellular metabolites and oxygen across the chamber where they are cultured. This  
75 metabolic heterogeneity can be accompanied by the addition of other components of

76 the tumor microenvironment, such as stromal cells, an extracellular matrix, and  
77 perturbations with carcinogens or drugs. Compared to the methods mentioned above,  
78 the spatiotemporal complexity that emerges in the MEMIC is predictable, reproducible,  
79 and measurable.

80 Here, we expand on key features of the MEMIC and provide detailed guidelines on how  
81 to use this system. We determined key parameters that shape metabolic gradients in  
82 the MEMIC, which we describe alongside detailed information on how to assemble the  
83 platform, how to set up cultures of tumor cells – alone or in co-culture – and how to  
84 monitor these experiments using live imaging and fixed endpoint microscopy assays,  
85 such as immunofluorescence. We demonstrate that the MEMIC accurately captures the  
86 cellular response to nutrient and oxygen deprivation that occur *in vivo*, and we show  
87 that nutrient-deprived macrophages reduce epithelial features in neighboring tumor  
88 cells. Finally, we provide an image analysis pipeline designed to obtain information at  
89 the single-cell level from MEMIC images suitable for users without any coding  
90 experience. We propose the MEMIC as a complement to standard *in vitro* and *in vivo*  
91 experiments, diversifying the tools available to accurately model, perturb, and monitor  
92 the tumor microenvironment, as well as to understand how extracellular metabolites  
93 affect other processes such as wound healing and stem cell differentiation.

## 94 **RESULTS**

### 95 **MEMIC – an overview**

96 A hallmark of the microenvironment of virtually all solid tumors is the presence of  
97 hypoxic and poorly nourished niches (Gatenby and Gillies, 2008; Hobson-Gutierrez and  
98 Carmona-Fontaine, 2018b; Lyssiotis and Kimmelman, 2017; Thomlinson, 1977b).  
99 These conditions are the result of the increased growth of tumor cells and insufficient  
100 blood perfusion (Baish and Jain, 2000; Carmeliet and Jain, 2000b; Pavlova and  
101 Thompson, 2016b). Because tumor growth and tumor vascularization are not uniform,  
102 they create a heterogeneous ‘metabolic microenvironment’ where some cells  
103 experience near physiological conditions, whereas others endure severe ischemia, and  
104 potentially cell death, due to lack of nutrients and accumulation of toxic waste  
105 (Carmona-Fontaine et al., 2013; Gatenby and Gillies, 2008; Thomlinson, 1977b). The  
106 MEMIC is a 3D-printed microphysiological culture system specifically designed to model  
107 this spectrum of metabolic conditions (Video 1). In addition, the MEMIC allows co-  
108 culturing any number of cell types to study how different cells interact and behave in  
109 different metabolic niches (Carmona-Fontaine et al., 2017b).

110 To generate these gradients of metabolic conditions, cells in the MEMIC grow inside a  
111 small chamber that is connected – only from one end – to a large reservoir of fresh  
112 media (or outer chamber, Fig 2A,B). The concentration gradients of extracellular  
113 metabolites in the MEMIC are established by a balance between their diffusion rate and  
114 their rates of consumption and secretion by cells in the small chamber. Cells proximal to  
115 the opening, therefore, have a constant supply of nutrients and oxygen and the

116 metabolic byproducts they secrete are quickly cleared by fresh media from the  
117 reservoir. In contrast, cells at the opposite end of the small chamber endure a  
118 microenvironment where oxygen and nutrients are scarce and metabolic byproducts  
119 accumulate (Fig 2C).

120 The MEMIC framework described here is composed of 12 independent MEMIC  
121 chambers facilitating multiplexing, technical replicates, and no-gradient controls (Fig  
122 2A). The small chamber where cells grow is sealed by optical glass coverslips, and thus  
123 it is ideal for high resolution microscopy analyses (Fig 2B). The 12-MEMIC framework  
124 has the same footprint as a multi-titer plate and is therefore compatible with  
125 conventional equipment such as microscope stages. The main requirement to fabricate  
126 a MEMIC is access to a 3D printer, which is inexpensive when compared to most lab  
127 equipment, and they are often available as a shared resource at universities and  
128 research institutions. In the Supplementary Information linked to this article, we provide  
129 a detailed protocol and a video on how to 3D print and assemble this system (Fig S1,  
130 Video 2, SI Fabrication).

### 131 **Cellular responses to nutrients and oxygen gradients**

132 To observe the cellular responses to metabolic gradients, we quantified the activation of  
133 key nutrient and oxygen sensing pathways. The mammalian target of rapamycin  
134 (mTOR) pathway is a major nutrient sensor and a regulator of anabolic metabolism  
135 (Saxton and Sabatini, 2017). We first cultured human colorectal adenocarcinoma cells  
136 (DLD1) in the MEMIC for 24h and we then used immunofluorescence to detect  
137 phosphorylated S6 (p-S6) as a read-out of TORC1 pathway activation. For a detailed

138 description on how to seed cells in the MEMIC and to process them for  
139 immunofluorescence, please refer to the Supplementary Information (Fig S2, SI  
140 Seeding and processing). Cells in these cultures, show high levels of S6  
141 phosphorylation near the opening of the MEMIC but these levels decrease dramatically  
142 under ischemic environments (Fig 2D). Conversely, Hypoxia-inducible factor 1-alpha  
143 (HIF1 $\alpha$ ) is a transcription factor that regulates the cellular response to hypoxia. In the  
144 absence of oxygen, HIF1 $\alpha$  is stable and accumulates in the nucleus, otherwise it is  
145 targeted for proteasomal degradation. HIF1 $\alpha$  is barely detectable near the opening of  
146 the MEMIC, but its levels steeply increase in ischemic regions (Fig 2D). A similar  
147 decrease in activation of the mTOR pathway (Palm et al., 2015) and increase of HIF1 $\alpha$   
148 (Zhong et al., 1999) has been observed in solid tumors *in vivo*.

149 To acquire information at the single-cell level, we wrote software that rapidly detects cell  
150 nuclei, segments individual cells and obtains key parameters such as their position,  
151 area, and fluorescence intensity (Fig 2E). This approach is similar to flow cytometry in  
152 that it quantifies the fluorescence of individual cells, but unlike flow cytometry, it retains  
153 critical spatial information. To help the wider research community use this image  
154 cytometry approach, we provide MATLAB scripts and a step-by-step tutorial fit for  
155 scientists without any coding experience (see Image cytometry section in  
156 Supplementary Information).

157 We used this image cytometry approach to analyze the images shown in Fig 2D. We  
158 first plotted HIF1 $\alpha$  level for every cell *versus* its p-S6 levels (Fig 2F). To incorporate  
159 spatial information, we color-coded each cell on the plot according to its distance from



160 the MEMIC opening. To emphasize the role of positional information and the spatial  
161 patterns that emerge we can plot the fluorescence levels of each cell *versus* its distance  
162 from the opening of the MEMIC as shown in Fig 2G. The quantification shows an  
163 exponential decrease in mTOR activation as cells are further away from the opening –  
164 consistent with a gradual decrease in nutrient availability. By contrast, we observed a  
165 sharp increase in nuclear HIF1 $\alpha$  within ischemic areas of the MEMIC. Although oxygen  
166 levels are expected to form a smooth gradient, we observe a stepwise increase in  
167 HIF1 $\alpha$  levels. This digital response emerges from the threshold of oxygen tension that  
168 determines whether HIF1 $\alpha$  is degraded or not (Lee et al., 2015; Wong et al., 2011).  
169 Overall, these results illustrate the formation of metabolite concentration gradients in the  
170 MEMIC and show that these gradients are translated into finely tuned intracellular  
171 signaling pathways.

## 172 **Shaping metabolic gradients in the MEMIC**

173 Interstitial levels of extracellular metabolites *in vivo* are determined by a balance of  
174 metabolite diffusion and cellular activities such as consumption and secretion rates. As  
175 such, the slopes of concentration gradients of these metabolites vary according to  
176 tissue crowding, nutrient transporter levels, growth rate, and other parameters that are  
177 difficult, or impossible, to untangle *in vivo*. Gradients in the MEMIC are formed by the  
178 same principles, however, in this system we are able to tune parameters independently  
179 and shape these gradients according to specific experimental needs.

180 To accurately measure and tune parameters in the MEMIC, we used a fluorescent  
181 hypoxia reporter as a readout for metabolic gradients ((Vordermark et al., 2001) see SI

182 for details). We engineered human breast tumor cells (MDA-MB-231) to express GFP  
183 under the control of five HIF1 $\alpha$  binding sites (Fig 3A). As a fluorescence reference, we  
184 also expressed a membrane-bound form of mCherry in these cells (mCherry-CAAX, see  
185 SI for details).

186 Denser cultures should form steeper gradients as more cells consume nutrients and  
187 oxygen. To test the effect of cell density on these gradients, we seeded different cell  
188 numbers into the MEMIC and measured GFP levels after 24 hours. With the lowest cell  
189 density (125 cells/ $\mu$ L or ~12% confluency), GFP signal was not detectable, indicating  
190 that the collective oxygen consumption was not enough to activate a hypoxic response  
191 even in the far end of the chamber (Fig 3B). At higher cell densities, however, GFP  
192 signal becomes evident and its intensity gradients are steeper, have a larger amplitude,  
193 and peak closer to the opening. At the highest cell density (1000 cells/ $\mu$ L or >100%  
194 confluency) GFP levels peak almost at the opening of the MEMIC (Fig 3B). From there,  
195 GFP levels drop as cells become anoxic and necrotic (Fig 3B). Together, these results  
196 confirm that denser cultures produce steeper metabolic gradients. In subsequent  
197 experiments, we used intermediate cell densities (250-500 cells/ $\mu$ L) that create strong  
198 gradients but that are shallow enough to clearly distinguish well-nurtured, nutrient-  
199 deprived, and necrotic regions within the MEMIC (e.g. Fig 2C).

200 The formation of the ischemic gradient is a dynamic process. To establish how these  
201 gradients develop over time, we seeded the same engineered MDA-MB-231 cells into  
202 the MEMIC and tracked their fluorescence levels using live microscopy and image  
203 analysis. While constitutive membrane-mCherry levels remain constant (Video 3), GFP

204 levels dramatically increase after about 12h in the distal regions of the MEMIC (Fig 3C,  
205 Video 3). Over time, the amplitude of the gradient increases and it becomes steeper. In  
206 a control culture where cells were well-nurtured throughout the well, no hypoxia was  
207 detectable throughout the entire experiment (Fig 3C).

208 We expected that the intensity and shape of metabolic gradients will also depend on the  
209 geometry of the MEMIC chamber. Using mathematical modeling we predicted that the  
210 height of the MEMIC is the critical geometric parameter in determining the position and  
211 slope of metabolic gradients (Carmona-Fontaine et al., 2013). This model also predicts  
212 that the width of the MEMIC's opening should not affect the shape of the gradient. To  
213 test these predictions, we seeded a constant number of MDA-MB-231 cells expressing  
214 the 5xHRE/GFP hypoxia reporter in MEMICs with different heights or with different  
215 opening widths and we imaged them after 24 hours ( $5 \times 10^5$  cells, Fig. 3D,E). As  
216 predicted by our model, changing the width of the opening did not affect the shape of  
217 metabolite gradients. Cells seeded in MEMICs with different opening widths increased  
218 GFP expression at a constant distance from the opening. When we plot the GFP levels  
219 *versus* distance to opening, the signal from all experiments collapse into a single curve  
220 regardless of the opening width used (Fig 3D). While the width of the MEMIC opening  
221 has little physiological relevance, it has an important experimental implication: the exact  
222 position of the top coverslip does not matter as long as the edge of the glass is used as  
223 a reference point. This observation makes the fabrication of MEMICs easier and more  
224 reproducible.

225 As shown in figure Fig 3E, the height MEMIC chamber is indeed key in shaping  
226 ischemic gradients. Cells cultured in thin MEMIC chambers (short height) have less

227 media, resulting in steeper gradients that peak close to the opening (Fig 3E). In taller  
228 chambers, ischemic gradients are shallower and peak further inside the chamber. The  
229 length scales in the MEMIC are much larger than *in vivo* where cells are tightly packed,  
230 and thus, their equivalent of the MEMIC height parameter is very small. As a reference  
231 point, tumor cells are completely hypoxic at about 150-200 $\mu$ m from the closest blood  
232 vessel (Carmona-Fontaine et al., 2017a; Hobson-Gutierrez and Carmona-Fontaine,  
233 2018a; Thomlinson, 1977a). This distance is about an order of magnitude smaller than  
234 gradients in the MEMIC and spans only about 10-20 cell diameters. The shallower  
235 gradients in the MEMIC stretch spatial patterns to a few hundred cell diameters, greatly  
236 increasing the spatial resolution of our experiments. Despite this being an advantage for  
237 our experiments, it is important to keep in mind these scale differences and adapt the  
238 MEMIC's geometry if needed.

### 239 **Effects of metabolic gradients on cell proliferation**

240 Nutrients provide the biomass and energy that all cells require to proliferate, and tumor  
241 cells are no exception. Cells in perivascular, and other well-perfused tumor regions,  
242 proliferate actively, while cells within nutrient-deprived tumor regions often show lower  
243 growth rates, senescence, and they can ultimately die (Carmona-Fontaine et al., 2013;  
244 Gatenby and Gillies, 2008; Thomlinson, 1977b). We wanted to test whether we can  
245 reproduce these spatial patterns of cell proliferation in the MEMIC. We used cells  
246 expressing FUCCI (Fluorescent Ubiquitination-based Cell Cycle Indicator, Fig 4A), a  
247 dual fluorescent reporter that enables the visualization of cell cycle progression  
248 (Sakaue-Sawano et al., 2008). Using our image cytometry approach (Fig. 2E), we

249 quantified fluorescence levels *per* nuclei. To avoid confounding effects due to  
250 aneuploidy and polyploidy that most tumor cells have, we used RPE1 cells – a nearly  
251 diploid immortalized epithelial human cell line with a relatively stable genome (Davoli  
252 and Lange, 2011; Watkins et al., 2020). RPE1 cells proliferate rapidly, as shown by the  
253 many cells in M phase in the no gradients control culture (Fig 4B). The same was true in  
254 well-nurtured regions of the MEMIC. However, ischemic cells showed a stark arrest at  
255 G<sub>1</sub> denoted by high mKO2-CDT1 and low mAG-GMNN levels (Fig 4C). A similar arrest  
256 at G<sub>1</sub> has been reported in tumors *in vivo* (Yano et al., 2014). *De novo* nucleotide  
257 synthesis is very sensitive to nutrient limitation (Ducker and Rabinowitz, 2016),  
258 suggesting that ischemic cells in the MEMIC – and in tumors– may arrest in G<sub>1</sub> as they  
259 fail to synthesize enough nucleotides to duplicate their genomes. We detected a similar  
260 spatial pattern of cell proliferation in tumor cells using immunofluorescence. Lung  
261 adenocarcinoma cells proliferate rapidly as evidenced by a high number of nuclei  
262 positive for phosphorylated Histone H3 (p-H3). As shown in Fig 4D, these numbers  
263 decline rapidly in ischemic regions of the MEMIC (Fig 4D, E). Overall, these results  
264 show that metabolic gradients in the MEMIC induce changes in cell proliferation that are  
265 consistent with nutrient availability and *in vivo* observations. More broadly, these proof-  
266 of-principle data show the important role that extracellular metabolites play in producing  
267 spatial patterns of cell behavior.

## 268 **Untangling the effects of different metabolites in the MEMIC**

269 The fast proliferation rate of tumor cells requires exogenous sources of multiple  
270 nutrients including glucose (Gatenby and Gillies, 2004; Heiden et al., 2009), aspartate

271 (Birsoy et al., 2015; Sullivan et al., 2015), non-essential amino acids such as glutamine  
272 (Son et al., 2013), glycine (Jain et al., 2012), serine (Maddocks et al., 2012; Possemato  
273 et al., 2011), and asparagine (Halbrook et al., 2020; Krall et al., 2020; Pavlova et al.,  
274 2018), as well as diet-derived essential amino acids, vitamins, and lipids (Bose et al.,  
275 2020). Ischemic tumor cells *in vivo* experience reduced levels of oxygen and all these  
276 numerous nutrients – and the accumulation of secreted metabolic byproducts such as  
277 lactate. Modeling this complex environment is difficult, and thus, most cell metabolism  
278 studies focus on limiting a single substrate.

279 In the MEMIC cells spontaneously form complex metabolic gradients, better  
280 approximating *in vivo* conditions. While these more physiological conditions can be  
281 advantageous, they also can also challenge the experimental uncoupling of individual  
282 metabolites and their hierarchical relationships. Here we provide an experimental  
283 approach to tackle this challenge. First, in the MEMIC we can easily distinguish effects  
284 that *require* hypoxia from changes produced by nutrient scarcity. To do this separation,  
285 we take advantage of the gas permeability of polydimethylsiloxane (PDMS (Cox and  
286 Dunn, 1986)). PDMS is a biocompatible and transparent polymer that we shape into  
287 membranes the size of the conventional glass coverslips that we use in the MEMIC  
288 (Fig. S1). Cells in MEMICs sealed with a PDMS membrane – instead of a glass  
289 coverslip – will experience gradients of nutrients but no hypoxia as oxygen is rapidly  
290 equilibrated across the PDMS membrane (Fig. 5A). To illustrate this approach, we  
291 cultured cells expressing the 5xHRE/GFP hypoxia reporter and we grew them in  
292 MEMIC constructed with glass, PDMS, or no coverslips (Fig 5A). As shown in Figure 5,  
293 only cells in a MEMIC sealed with glass showed GFP signal gradients (Fig 5C). To test

294 if hypoxia is *sufficient* to produce a particular effect, these MEMIC experiments can be  
295 complemented with conventional *in vitro* cultures in hypoxic incubators where oxygen is  
296 set at specific tensions. Similarly, to determine the effects of specific soluble nutrients  
297 we can simply remove them from the media formulation, or we can add them at  
298 saturating concentrations. For example, we demonstrate that a decrease in media pH-  
299 directly induced cell death by increasing the buffer capacity of culture media (Carmona-  
300 Fontaine et al., 2013). Overall, this section illustrates that cells in the MEMIC create  
301 complex metabolic gradients while still allowing to untangle, identify, and manipulate  
302 specific microenvironmental factors.

### 303 **Ischemic macrophages decrease epithelial features in neighboring tumor cells**

304 The complexity of the microenvironments within the MEMIC can be increased as  
305 needed. For instance, we can incorporate additional cell types to approximate the *in*  
306 *vivo* microenvironment and to study cell-cell interactions under different metabolic  
307 conditions. Extracellular metabolites can directly modulate cell phenotypes and tumor-  
308 immune interactions (Buck et al., 2017; Olenchock et al., 2017b).

309 We and others have previously shown that tumor-secreted lactate and low oxygen  
310 tension induce a pro-angiogenic phenotype in tumor-associated macrophages  
311 (Carmona-Fontaine et al., 2017a; Colegio et al., 2014; Wenes et al., 2016). Here we  
312 focused on how ischemic macrophages affect neighboring tumor cells. We first  
313 observed that virtually every ischemic tumor cell cultured in the MEMIC became more  
314 dysplastic, lose their multicellular epithelial arrangements, and adopt a round or spiked  
315 morphology. These effects were exacerbated when tumor cells were co-cultured with

316 Bone Marrow-Derived Macrophages (BMDMs). We thus hypothesized that ischemia  
317 and the presence of macrophages synergize to alter the morphology of tumor cells.

318 To formally test this idea, we used clones derived from MMTV-PyMT breast tumors. In  
319 culture, these cells form geometric epithelial structures and display high levels of E-  
320 Cadherin and other epithelial markers (Fig 6A,B). Consistent with the known effects of  
321 hypoxia, we observed a significant decrease in E-Cadherin levels in ischemic cells (Fig  
322 6A). We compared these results with similar experiments where we co-cultured the  
323 same tumor cells with BMDMs, ensuring we maintained the same total cell number. In  
324 these co-cultures, ischemic tumor cells dramatically reduced their epithelial morphology  
325 and the drop in E-Cadherin was much stronger and it occurred closer to the opening  
326 (Fig 6B,C). These morphological and molecular changes suggest that tumor cells are  
327 undergoing epithelial to mesenchymal transition (EMT) – a key step in the development  
328 of most carcinomas which represent ~80% of all solid tumors, (Weinberg, 2013).

329 Consistent with our observations, HIF1 $\alpha$  directly promotes EMT (Dongre and Weinberg,  
330 2018; Nieto, 2013) and tumor-associated macrophages can also drive EMT in tumors  
331 (Condeelis and Pollard, 2006; Linde et al., 2018). Our results suggest that ischemia and  
332 signals from *ischemic* macrophages synergize to trigger EMT in tumor cells (Fig 6D).

333 While the molecular underpinnings of this synergy still need to be elucidated, these  
334 results illustrate how the MEMIC can be used to study the interplay between different  
335 cellular and molecular factors in the tumor microenvironment.



## 336 **DISCUSSION**

337 *In vivo* animal tumor models are – and will continue to be – crucial in cancer research.  
338 However, they are expensive and difficult to scale up. Additionally, it is virtually  
339 impossible to accurately control and measure multiple experimental parameters in these  
340 experiments. At the other extreme of the experimental spectrum, conventional *in vitro*  
341 cell cultures allow the control of most experimental parameters, but this simplicity  
342 comes at the cost of losing the context of the intricacy and heterogeneity of tumors. The  
343 microphysiological culture system described here – named MEMIC – seeks to bridge  
344 these extremes by re-creating key aspects of the complexity of tumors under tunable  
345 and controllable conditions.

346 Cells in the MEMIC form concentration gradients of oxygen and nutrients equivalent to  
347 those formed in tumors *in vivo*. These different levels of nutrients induce changes in  
348 major signaling pathways that in turn change cell behaviors and phenotypes in  
349 predictable spatial patterns. As an example, we showed how concentration gradients of  
350 nutrients in the MEMIC lead to a heterogeneous microenvironment that ranges from  
351 well-nurtured conditions – where cells rapidly proliferate – to increasingly more ischemic  
352 environments where cells show cell cycle arrest. This heterogeneous distribution of  
353 resources and the resulting regions with high and low cell proliferation are well  
354 documented in the analysis of histological tumor samples from patients (Weinberg,  
355 2013).

356 The simplicity and affordability of the MEMIC makes it compatible with mid- to high-  
357 throughput experiments and screens. Most chemotherapy drugs target rapidly

358 proliferating cells, senescent and non-proliferating tumor cells are spared and leading to  
359 lower tumor regression and relapse (Gordon and Nelson, 2012; Oshima et al., 2020).  
360 Thus the MEMIC could be particularly useful for screening drugs that more efficiently  
361 target ischemic regions of tumors, where non-proliferating cells are abundant.

362 Since nutrient levels change gradually with distance from their source, cellular changes  
363 in the MEMIC follow predictable spatial patterns. We and others have previously shown  
364 that similar spatial patterns emerge *in vivo* following the distribution of the vascular  
365 network (Carmona-Fontaine et al., 2017b; Gatenby and Gillies, 2008; Hobson-Gutierrez  
366 and Carmona-Fontaine, 2018b; Thomlinson, 1977b). The idea that nutrient and oxygen  
367 availability influence cell behavior and the tumor microenvironment is not new.

368 However, this effect has been hard to model experimentally. With the combined power  
369 of *in vivo* observation and experiments in the MEMIC, we can argue that metabolite  
370 gradients do not only change cell phenotypes, but they organize and pattern the tumor  
371 microenvironment.

372 The spatial patterns that nutrient gradients impose in the tumor microenvironment also  
373 modulate cell-cell interactions. We showed here that ischemic macrophages reduce  
374 epithelial features in neighboring tumor cells. This inhibition of epithelial features is  
375 much stronger than the direct effects of nutrient deprivation alone. We thus propose that  
376 signals from ischemic macrophages synergize with the effects of hypoxia and nutrient  
377 deprivation to induce a stronger EMT in tumor cells (Fig. 6D). Overall, we think that the  
378 MEMIC provides a platform to model complex multicellular and heterogeneous *in vivo*  
379 conditions. In addition to having most of the advantages of conventional *in vitro* cultures,  
380 experiments in the MEMIC can be designed to incorporate high molecular and cellular

381 complexity. This complexity can be increased gradually to carefully tease apart key  
382 factors shaping the tumor microenvironment. We believe that the process of  
383 deconstructing tumors into their basic units, and then carefully reassembling them in the  
384 MEMIC, will help us to better understand and control the tumor microenvironment.

385

## 386 **MATERIALS AND METHODS**

### 387 **Cell culture**

388 C6-HRE-GFP were a generous gift from Dr. Inna Serganova (Memorial Sloan Kettering  
389 Cancer Center). PyMT cells were derived by Daniela Quail (McGill University). MDA-  
390 MB-231 (HTB-26), HEK293T, and DLD-1 (CCL-221) cells were purchased from ATCC.

391 C6-HRE-GFP cells, MDA-MB-231 cells, DLD-1 cells, LN-99, and HEK293T cells were  
392 grown in High Glucose DMEM (Gibco, 11965-092) supplemented with 10% Fetal Bovine  
393 Serum (FBS; Sigma-Aldrich, F0926). RPE cells were grown in High Glucose DMEM-  
394 F12 medium (Gibco, 11039) containing 10% FBS. All cells were incubated at 5% CO<sub>2</sub>  
395 and 37°C.

### 396 **Animal protocols and differentiation of BMDMs**

397 Bone marrow-derived macrophages (BMDMs) were extracted from C57BL/6 mice using  
398 standard protocols (Gocheva et al., 2010). Following euthanization, femurs and tibiae  
399 were harvested from both legs of the mice under sterile conditions. After careful  
400 cleaning of the tissue, the bone marrow was flushed using a 25-gauge needle and  
401 passed through a 40 µm strainer. The bone marrow flush was cultured in low  
402 attachment culture dishes (VWR, 25384-342) in High Glucose DMEM supplemented  
403 with 10% FBS, 10 ng/mL Recombinant Mouse CSF-1 (R&D Systems, 416-ML), and 1x  
404 Antibiotic-Antimycotic (Gibco, 15240) for 7 days. Media was replaced every other day to  
405 induce macrophage differentiation. All protocols involving animal work were approved

406 by NYU's University Animal Welfare Committee (UAWC protocols 17-1496 and 19-  
407 1515).

#### 408 **Construction of genetic fluorescent reporters**

409 To create a hypoxia reporter for live imaging, an existing GFP-based HIF1 $\alpha$  reporter  
410 (Vordermark et al., 2001), Addgene, 46926) was subcloned into a lentiviral delivery  
411 plasmid using a Gibson assembly-based modular assembly platform (GMAP) (Akama-  
412 Garren et al., 2016). The 5xHRE-GFP region and a PGK-driven puromycin selection  
413 cassette from the pMSCV-Peredox-mCherry-NLS plasmid (Addgene, 32385) were  
414 amplified using primers containing overhangs with the homology sites for GMAP cloning  
415 and inserted into a lentiviral vector (LV 1-5, Addgene, 68411). This lentiviral backbone  
416 was a gift from Dr. Tyler Jacks (Massachusetts Institute of Technology) and Dr. Thales  
417 Papagiannakopoulos (New York University). The DNA construct for this new hypoxia  
418 reporter is available in Addgene.

419 To create a fluorescent membrane label, we used the CAAX sequence method to target  
420 a fluorescent protein to the plasma membrane (Hancock et al., 1989) . mCherry was  
421 PCR amplified from pMSCV-Peredox-mCherry-NLS (Addgene, 32385) using primers  
422 containing overhangs with the homology sites for GMAP cloning. The reverse primer  
423 inserted the CAAX polybasic sequence. The CMV promoter and enhancer sequence to  
424 drive CAAX-mCherry expression was amplified from pLenti-CMV-Puro-DEST plasmid  
425 (Addgene, 17452). The two fragments were then assembled into one using overlapping  
426 PCR and inserted into LV 1-5 using the GMAP method. The DNA construct for this new

427 fluorescent membrane reporter is available in Addgene.

428 Both resulting constructs were delivered to destination cells through lentiviral  
429 transduction. Briefly, lentiviruses were packaged in HEK293T cells through co-  
430 transfection with 2 $\mu$ g of VSV-G, 4 $\mu$ g of Delta8.9 viral vectors and 6 $\mu$ g of 5xHRE-GFP or  
431 mCherry-CAAX vector using Lipofectamine 3000 reagent (Thermo Scientific, L3000) in  
432 Opti-MEM (Gibco, 31985). The vectors mentioned above were kindly provided by Dr.  
433 Nicholas P. Gauthier (Dana Farber Cancer Institute). On day 2, Opti-MEM media was  
434 replaced with fresh DMEM supplemented with FBS. On days 3 and 5 after transfection,  
435 the virus-containing medium was collected, filtered through 0.45 $\mu$ m filters, and  
436 immediately stored at -80°C until infection. For lentiviral infection, 1 mL of freshly thawed  
437 virus media mixed with 1 mL of culture media along with 10 $\mu$ g/mL polybrene was plated  
438 onto destination cells in a 6-well plate at 40-60% confluency. For the 5xHRE-GFP  
439 infection, infected cells were selected using 1 $\mu$ g/mL puromycin for 4 days starting 48  
440 hours after transduction. For the mCherry-CAAX infection, infected cells were selected  
441 using fluorescence-activated cell sorting. To create the cell line with both mCherry-  
442 CAAX and 5xHRE-GFP, we used the lentiviral particles containing the mCherry-CAAX  
443 insert to infect a 5xHRE-GFP cell line and then selected for using both selection  
444 methods.

#### 445 **Printing and Manufacturing the MEMIC**

446 The main framework of the MEMIC is 3D printed using fused filament fabrication, which  
447 allows for on-demand supply as well as easy design modifications. For a detailed, step-

448 by-step MEMIC fabrication protocol, please refer to the supplementary information  
449 attached to this manuscript and to supplementary videos S1 and S2. We designed the  
450 framework using CAD software and printed them using Ultimaker 3D printers and black  
451 PLA filament (Ultimaker) – a biocompatible, non-autofluorescent, and biodegradable  
452 material. Other printers and other materials may be used as well, depending on printer  
453 availability and experimental design. The printer settings, as well as the 3D design, that  
454 we use can be found in the supplementary information of this paper. We showcase a  
455 fused-filament-fabricated MEMIC version in this paper, as we believe that the  
456 combination of the widening availability of fused filament printers in research facilities  
457 and their precision would make this MEMIC the best option for most users. We also  
458 describe other options in the supplementary information.

459 Once a 3D-printed framework was retrieved from the printer, glass coverslips (No. 1,  
460 18x18 mm; VWR) were glued to it using a UV-curable adhesive (NOA68, Norland  
461 Products) to create 12 individual chambers. We provide a detailed video on how to use  
462 the NOA68 and how to glue coverslips onto the MEMIC (Video S2). To create the  
463 bottom of the chambers, the coverslips were glued so that one completely covers each  
464 opening. The glue must completely seal the glass surrounding the opening to prevent  
465 leakage from the bottom of the chamber but should not seep into the surface of the  
466 chamber where cells will be seeded, as this limits space for cell adhesion. Once the  
467 adhesive was carefully applied, it was cured for 15 minutes under a long-wave UV lamp  
468 (DR-5401, MelodySusie). To complete construction of the inner chamber, glass  
469 coverslips were glued to the inside of each well with one edge against the inner ridge.

470 This created the top layer of the gradient chamber and an opening to the media  
471 reservoir. Some chambers were left open without a top glass layer so that no gradients  
472 form, which are used as controls. The top layer adhesive was cured for 15 minutes  
473 under a long-wave UV lamp. For a fully detailed protocol on manufacturing and  
474 illustrative images, please see the supplementary information.

475 To decouple the nutrient and hypoxia components of the ischemic gradient in the  
476 MEMIC, in some experiments the glass coverslip was replaced with PDMS coverslips.  
477 The PDMS coverslips were prepared using the Dow Sylgard 184 Silicone Encapsulant  
478 Kit. To prepare PDMS coverslips, 1 part of the curing agent was thoroughly mixed with  
479 10 parts of the silicone elastomer base by weight and centrifuged at 1300 RCF for 2-5  
480 minutes to remove any air bubbles. A petri dish was then coated with about 6mL of the  
481 mixture by gently swirling it. To remove trapped air bubbles, the dish was placed into a  
482 vacuum desiccator for approximately 5 minutes. Curing was done by placing the PDMS  
483 coated dish into an oven at 75°C for at least 2 hours. The layer of PDMS was then cut  
484 into 18x18mm squares, matching the dimensions of the glass coverslip. Since PDMS is  
485 hydrophobic and may pose problems while gluing to the MEMIC framework, the PDMS  
486 coverslips were treated with a plasma gun. Then, the PDMS coverslips were glued with  
487 NOA68 optical adhesive as described for the top glass coverslips above.

#### 488 **Seeding cells into the MEMIC**

489 To prepare the MEMIC for cell culture, the framework was first sterilized in a short-wave  
490 UV lamp (CM-2009, Meishida). Then, the inner chambers and wells of the MEMIC were  
491 washed twice with sterile DPBS (Gibco, 14040117). To improve cell attachment, the



492 chambers were filled with a 50 $\mu$ g/mL solution of Poly-D-Lysine (Sigma-Aldrich, P6407)  
493 in DPBS and incubated at 37°C overnight, then washed twice with DPBS. Afterwards,  
494 the chambers were washed with culture media. Cells to be seeded were detached from  
495 their dish using 0.05% Trypsin-EDTA (Gibco, 25300-062). A cell suspension containing  
496 10<sup>6</sup> cells/mL was prepared and the chambers were filled with 100 $\mu$ L of the suspension.  
497 To open wells serving as controls, 500 $\mu$ L of the cell suspension and 2.5mL fresh media  
498 was added. As the glass portion occupies about a fifth of the total surface of the well  
499 bottom, the resulting cell density on the glass portion should be similar to the closed  
500 wells. To allow cell attachment, the framework was placed into an incubator for  
501 approximately an hour. Once cells settled to the bottom of the chamber, the reservoir of  
502 the closed chambers was filled with 3mL fresh media. The framework was placed back  
503 into the incubator to start gradient formation.

#### 504 **Immunofluorescence**

505 After 24 hours of gradient formation, the media was aspirated from the wells and then  
506 carefully aspirated from the chambers using a pipette to prevent cell loss. The cells  
507 were fixed by filling the chambers with 2% (v/v) paraformaldehyde solution, obtained by  
508 diluting 4% paraformaldehyde (Affymetrix, 19943) 1:1 in PBS (Fisher Scientific, BP399)  
509 and incubating at room temperature for 5 minutes. The chambers were then gently  
510 washed twice with PBS. To permeabilize the cells for staining, the chambers were filled  
511 with a 0.1% (v/v) solution of Triton-X (Sigma-Aldrich, T8787) in PBS and incubated at  
512 room temperature for 5 minutes. The chambers were gently washed twice with PBS and  
513 filled with 100 $\mu$ L of blocking solution - 2.5% (w/v) bovine serum albumin (Sigma-Aldrich,

514 A9418) in PBS - and incubated for 1 hour at room temperature. The chambers were  
515 gently washed twice with PBS. A primary antibody dilution was prepared in the blocking  
516 solution with the antibodies diluted 1:200 for HIF1 $\alpha$  (BD Bioscience, 610958), 1:50 for  
517 phosphor-S6 (CST, 2211), 1:200 for E-cadherin (BD Bioscience, 610182), 1:200 for  
518 phospho-H3 (CST, 3377), and 1:200 for CD68 (Serotec, MCA1957) and was added to  
519 the chambers. The framework was placed inside a humidified chamber at 4°C. The  
520 primary antibody solution was removed. The chambers were washed 3 times with PBS  
521 and incubated at room temperature for 5 minutes. The chambers were then filled with a  
522 secondary antibody (1:500 dilution) and nuclear stain solution (Hoechst 33342, 1:2000)  
523 and incubated at room temperature for 1 hour in the dark. The chambers were finally  
524 washed with PBS three times. To preserve cells until imaging, we filled the chambers  
525 with a 0.02% (w/v) solution of sodium azide (Sigma-Aldrich, S2002) in PBS.

## 526 **Microscopy**

527 We imaged MEMICs using an inverted fluorescent microscope (Eclipse Ti2-E, Nikon)  
528 equipped with a spinning disk confocal unit (X-Light V2, CrestOptics). For live imaging,  
529 we used a stage top incubator (Tokai Hit, INUCG2-KRi) fed with a mixed gas source  
530 (5% CO<sub>2</sub> in compressed air, Airgas, X02AI95C2000117). Entire chambers were imaged  
531 in different fluorescent channels using tiling microscopy and then exported as stitched  
532 16-bit TIF files.

## 533 **Image Cytometry Analysis**

534 Microscopy images were processed using our MATLAB-based scripts. A full tutorial on

535 how to use our image cytometry code for users without image analysis experience is  
536 available with this paper (see SI for further details). This analytic approach can be used  
537 with MEMIC images, and also with any other fluorescent images of cells or cell clusters  
538 where fluorescence intensity and/or spatial information are of interest. Briefly, the  
539 software intakes images of multiple replicates or conditions, with a single TIFF image  
540 per channel per chamber, and outputs data on per cell fluorescence intensity, cell area  
541 on the image, and cell position on the image. It also produces plots of fluorescence  
542 intensity *versus* distance for each channel. The image analysis process requires that at  
543 least one channel displays a uniform stain across, such as a nuclear stain for a cell  
544 monolayer.

#### 545 **ACKNOWLEDGEMENTS**

546 We thank all members of the Carmofon Laboratory for feedback and comments on the  
547 manuscript. This work was supported by awards from the National Cancer Institute of  
548 NIH to C.C.-F. (R00 CA191021 and DP2 CA250005). C.C.-F. is a Pew Biomedical  
549 Fellow and additional support for this work was provided by the The Pew Charitable  
550 Trust (00034121) and the Center for Genomics & Systems Biology at New York  
551 University.

#### 552 **ADDITIONAL INFORMATION**

553 Supplementary information is available for this paper. Please visit  
554 <http://carmofon.org/publications/newmemic/> to download updated designs of the MEMIC  
555 and other information relevant to this work. Correspondence and requests for materials

556 should be addressed to C.C.-F.

## FIGURE LEGENDS

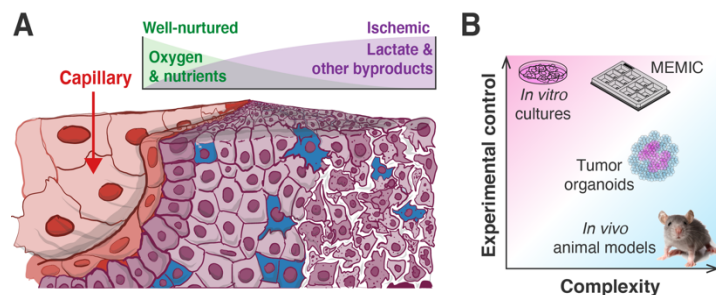

**Figure 1: The complexity of the tumor microenvironment and its experimental models.**

**A.** Due to the poor vascularization tumor cells are exposed to different metabolic conditions according to their distance to blood vessels. Proximal cells readily obtain oxygen and nutrients, while distal cells endure a lack of resources and accumulation of metabolic byproducts.

**B.** Models of the tumor microenvironment. *In vitro* cultures provide a high level of experimental control but they cannot capture key features of the tumor microenvironment. The complexity of *in vivo* models – and to some extent of 3D organoid cultures – comes at the cost of experimental control. The MEMIC allows for high complexity *in vitro* and *ex vivo* cultures while allowing for full experimental control.

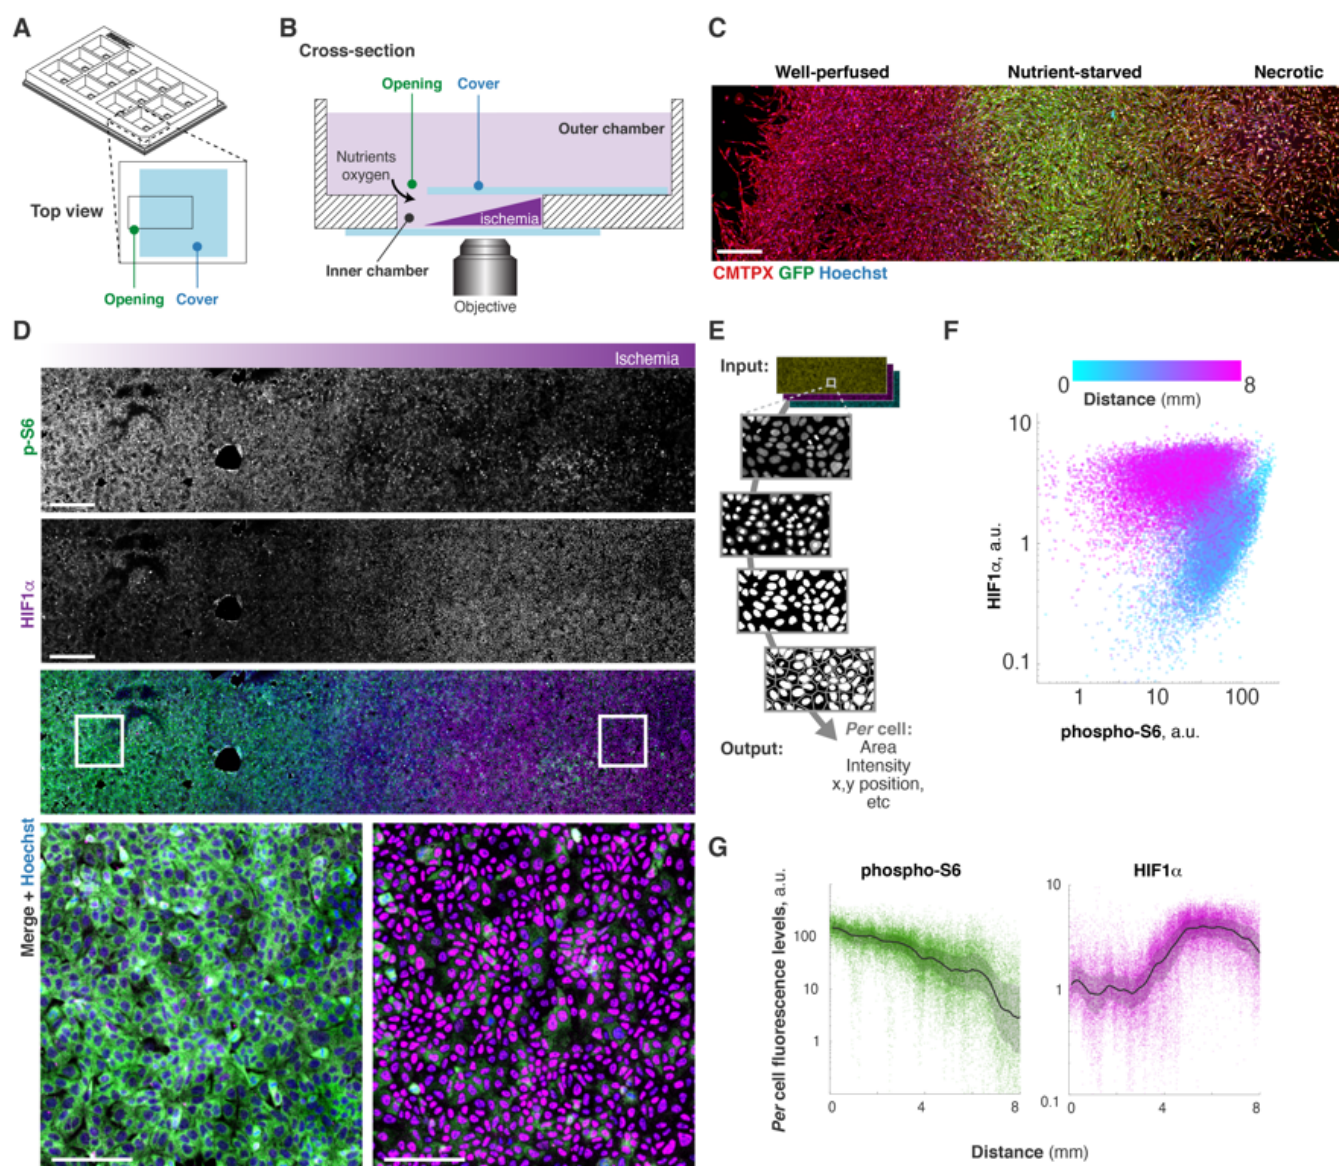

**Figure 2: Formation of metabolic gradients in the MEMIC**

- A.** View of 3D-printed framework containing 12 independent MEMICs. Each chamber is located within a separate well.
- B.** Cross-section view of a MEMIC. Cells are cultured in the inner chamber, generating metabolic gradients. The chamber is enclosed by a top and bottom glass coverslip, except for a narrow opening to a media reservoir, allowing for unilateral diffusion of fresh media into the chamber.
- C.** Cells expressing a GFP-based hypoxia reporter after 24h culture in the MEMIC. Cells show distinct metabolic landscapes. Scale bar: 500 $\mu$ m.
- D.** Metabolic conditions affect cell signaling and transcriptional programs. Immunofluorescent staining of DLD1 cells for phosphorylated ribosomal protein S6 (p-S6, a readout of active mTOR signaling, green) and for the transcription factor Hif1 $\alpha$  (purple). Scale bars: 800 $\mu$ m, 200 $\mu$ m for insets.
- E.** A typical image cytometry pipeline.
- F.** Quantification of **D.** shows p-S6 and Hif1 $\alpha$  levels *per cell*. Note the two distinct populations determined by the distance from the opening of the MEMIC.
- G.** Quantification of **D.** shows opposite trends in intensity of p-S6 and Hif1 $\alpha$ . Lines: moving median values, shaded region: interquartile range.



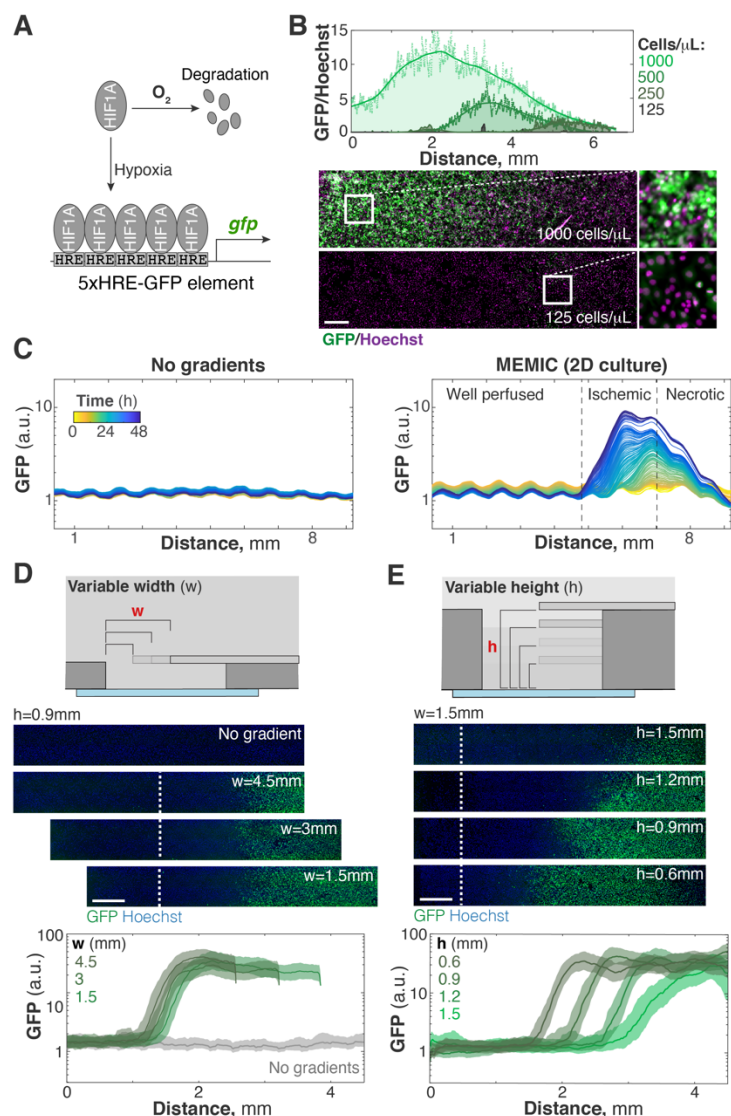

**Figure 3: Key parameters in shaping metabolic gradients in the MEMIC**

- A.** We used a GFP-based hypoxia reporter (5xHRE-GFP) as a readout for resource limitation.
- B.** Cell density has a dramatic effect in the shape of metabolic gradients. Top: median GFP levels (normalized by Hoechst) for MDA-MB-231 cells expressing 5xHRE-GFP and cultured at different densities for 24hr in the MEMIC. Bottom: Representative images of highest and lowest densities. Scale bar: 200 $\mu$ m.
- C.** Monolayer of 5HRE-GFP MDA-MB-231 cells shows that gradient formation in the MEMIC is dynamic and time dependent. Lines: moving median GFP intensity, color-coded by time.
- D.** 5HRE-GFP MDA-MB-231 cells form gradients at the same distance from the opening and with the same shape when the width of the MEMIC opening is changed. Lines: moving median GFP intensity, shaded regions: interquartile range.
- E.** 5HRE-GFP MDA-MB-231 cells form gradients that are further from the opening and shallower the taller the MEMIC chamber. Lines: moving median GFP intensity, shaded regions: interquartile range. Scale bars for C and D: 500 $\mu$ m.

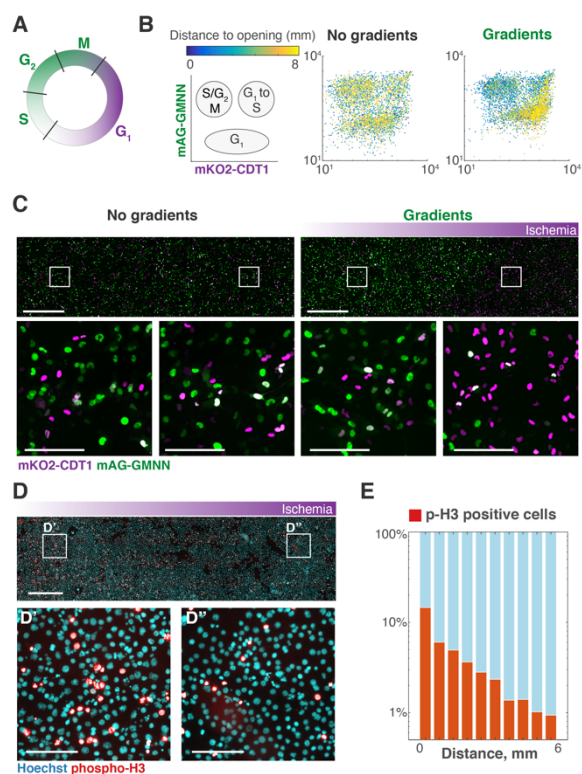

**Figure 4: Gradients of ischemia induce spatial patterns of cell proliferation**

**A.** Relationship between mKO2-CDT1 (purple) and mAG-GMNN (green) fluorescent levels and cell cycle phases for cells expressing FUCCI.

**B.** Quantification of FUCCI fluorescence RPE1 cells intensity in each cell nuclei. Cells arrested in G<sub>1</sub> are much more abundant in ischemic regions.

**C.** Representative images of RPE1 cells expressing FUCCI culture without gradients or in the MEMIC. Scale bars: 1000µm, insets: 200µm.

**D.** Immunofluorescent staining of phospho-H3 (red) in DLD1 tumor cells cultured in the MEMIC. Scale bars: 1000µm, insets: 100µm.

**E.** Quantification of **D**. shows the percentage of phospho-H3 positive cells binned along the distance from the opening. The percentage of proliferating cells drops in ischemic regions.



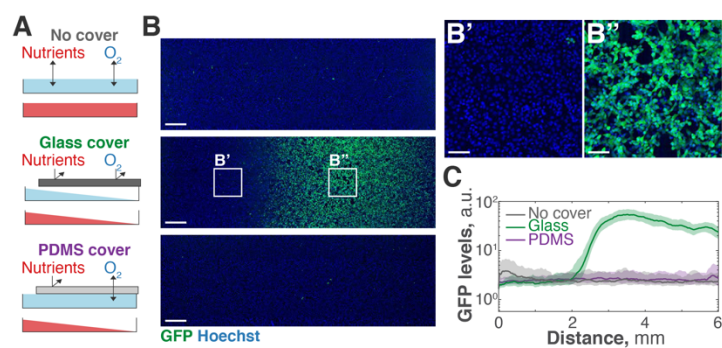

**Figure 5: Untangling gradients of hypoxia from other metabolites**

**A.** Schematic showing the different experimental conditions depending on the use of glass or PDMS coverslips in the MEMIC. PDMS is permeable to gases, but not soluble metabolites, decoupling the nutrient gradients from hypoxia.

**B.** 5HRE-GFP MDA-MB-231 cells grown in the MEMIC show hypoxia (GFP) in MEMIC with glass but not with PDMS coverslips (detail in **B'** and **B''**). Scale bars: 500 $\mu$ m, 100 $\mu$ m for insets.

**C.** Quantification of GFP levels for all three conditions. Lines: moving medians, shaded regions: interquartile range.

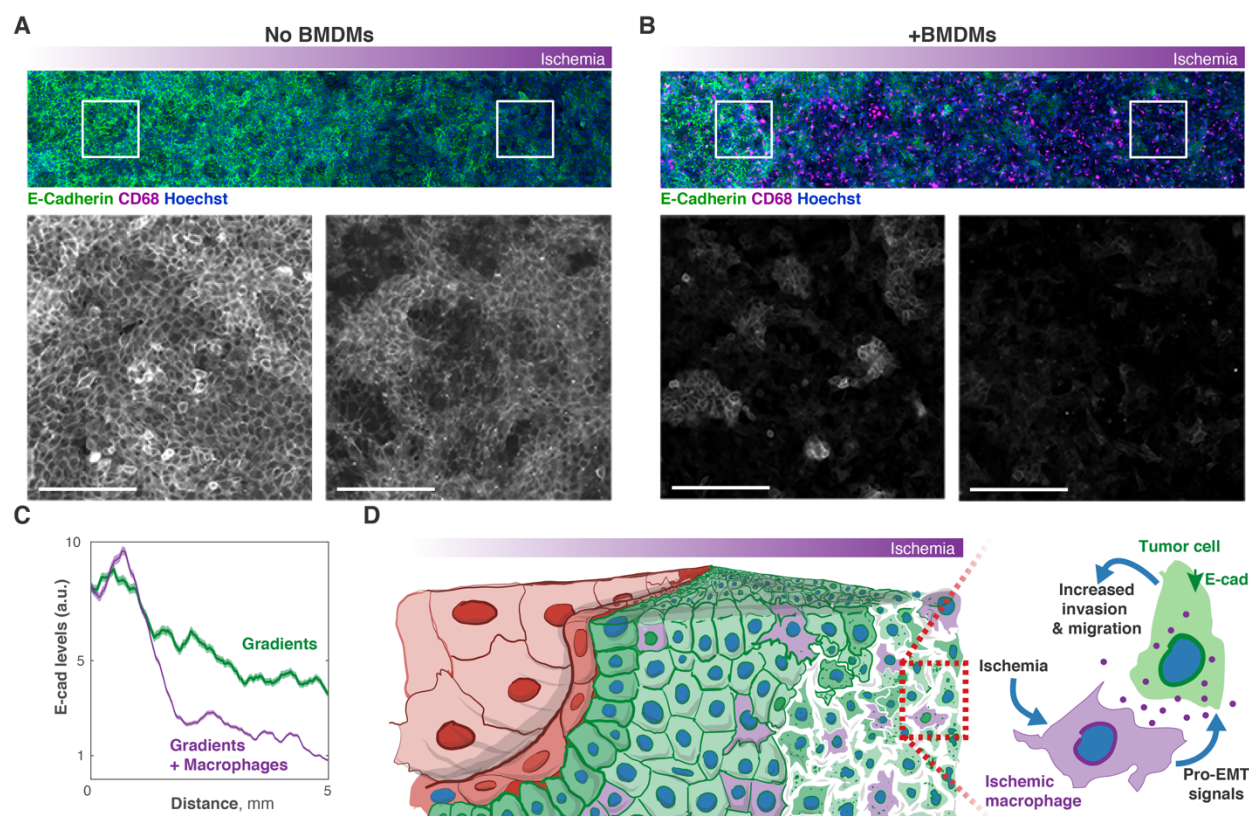

**Figure 6: Non-cell autonomous effects of ischemia**

**A.** Cells derived from MMTV-PyMT breast tumors decrease E-Cadherin expression (green) in ischemic areas of the MEMIC. Scale bars: 200 $\mu$ m.

**B.** Cells derived from MMTV-PyMT breast tumors co-cultured with bone-marrow-derived macrophages (CD68 immunofluorescence, magenta) show a stronger decrease in E-cadherin levels. Scale bars: 200 $\mu$ m.

**C.** Quantification of **A.** and **B.** shows that the presence of macrophages synergizes with ischemic conditions to suppress E-cadherin expression. Lines: moving medians, shaded regions: interquartile range.

**D.** Schematic showing how multiple factors within the tumor microenvironment synergize to promote EMT in tumor cells. Ischemic conditions induce EMT markers in tumor cells, which ischemic macrophages boost further.

## REFERENCES

- Akama-Garren, E. H., Joshi, N. S., Tammela, T., Chang, G. P., Wagner, B. L., Lee, D.-Y., Rideout, W. M., Papagiannakopoulos, T., Xue, W. and Jacks, T.** (2016). A Modular Assembly Platform for Rapid Generation of DNA Constructs. *Scientific Reports* **6**, 16836.
- Bader, J. E., Voss, K. and Rathmell, J. C.** (2020). Targeting Metabolism to Improve the Tumor Microenvironment for Cancer Immunotherapy. *Mol Cell* **78**, 1019–1033.
- Baish, J. W. and Jain, R. K.** (2000). Fractals and cancer. *Cancer Res* **60**, 3683–8.
- Bert, B., Dörendahl, A., Leich, N., Vietze, J., Steinfath, M., Chmielewska, J., Hensel, A., Grune, B. and Schönfelder, G.** (2017). Rethinking 3R strategies: Digging deeper into AnimalTestInfo promotes transparency in in vivo biomedical research. *Plos Biol* **15**, e2003217.
- Birsoy, K., Wang, T., Chen, W. W., Freinkman, E., Abu-Remaileh, M. and Sabatini, D. M.** (2015). An Essential Role of the Mitochondrial Electron Transport Chain in Cell Proliferation Is to Enable Aspartate Synthesis. *Cell* **162**, 540–551.
- Boj, S. F., Hwang, C.-I., Baker, L. A., Chio, I. I. C., Engle, D. D., Corbo, V., Jager, M., Ponz-Sarvisé, M., Tiriác, H., Spector, M. S., et al.** (2015). Organoid Models of Human and Mouse Ductal Pancreatic Cancer. *Cell* **160**, 324–338.
- Bose, S., Allen, A. E. and Locasale, J. W.** (2020). The Molecular Link from Diet to Cancer Cell Metabolism. *Mol Cell* **78**, 1034–1044.
- Bressers, S., Elzen, H. van den, Gräwe, C., Oetelaar, D. van den, Postma, P. H. A. and Schoustra, S. K.** (2019). Policy driven changes in animal research practices: mapping researchers' attitudes towards animal-free innovations using the Netherlands as an example. *Res Integr Peer Rev* **4**, 8.
- Buck, M. D., Sowell, R. T., Kaech, S. M. and Pearce, E. L.** (2017). Metabolic Instruction of Immunity. *Cell* **169**, 570–586.
- Carmeliet, P. and Jain, R. K.** (2000a). Angiogenesis in cancer and other diseases. *Nature* **407**, 249–257.
- Carmeliet, P. and Jain, R. K.** (2000b). Angiogenesis in cancer and other diseases. *Nature* **407**, 249–257.

- Carmona-Fontaine, C., Bucci, V., Akkari, L., Deforet, M., Joyce, J. A. and Xavier, J. B.** (2013). Emergence of spatial structure in the tumor microenvironment due to the Warburg effect. *Proceedings of the National Academy of Sciences* **110**, 19402–19407.
- Carmona-Fontaine, C., Deforet, M., Akkari, L., Thompson, C. B., Joyce, J. A. and Xavier, J. B.** (2017a). Metabolic origins of spatial organization in the tumor microenvironment. *Proceedings of the National Academy of Sciences* **114**, 2934–2939.
- Carmona-Fontaine, C., Deforet, M., Akkari, L., Thompson, C. B., Joyce, J. A. and Xavier, J. B.** (2017b). Metabolic origins of spatial organization in the tumor microenvironment. *Proceedings of the National Academy of Sciences* **114**, 2934–2939.
- Clevers, H.** (2016). Modeling Development and Disease with Organoids. *Cell* **165**, 1586–1597.
- Colegio, O. R., Chu, N.-Q., Szabo, A. L., Chu, T., Rhebergen, A. M., Jairam, V., Cyrus, N., Brokowski, C. E., Eisenbarth, S. C., Phillips, G. M., et al.** (2014). Functional polarization of tumour-associated macrophages by tumour-derived lactic acid. *Nature* **513**, 559–563.
- Condeelis, J. and Pollard, J. W.** (2006). Macrophages: Obligate Partners for Tumor Cell Migration, Invasion, and Metastasis. *Cell* **124**, 263–266.
- Cox, M. E. and Dunn, B.** (1986). Oxygen diffusion in poly(dimethyl siloxane) using fluorescence quenching. I. Measurement technique and analysis. *J Polym Sci Part Polym Chem* **24**, 621–636.
- Davoli, T. and Lange, T. de** (2011). The Causes and Consequences of Polyploidy in Normal Development and Cancer. *Annu Rev Cell Dev Bi* **27**, 585–610.
- Day, C.-P., Merlino, G. and Dyke, T. V.** (2015). Preclinical mouse cancer models: a maze of opportunities and challenges. *Cell* **163**, 39–53.
- Dongre, A. and Weinberg, R. A.** (2018). New insights into the mechanisms of epithelial–mesenchymal transition and implications for cancer. *Nat Rev Mol Cell Bio* **20**, 69–84.
- Ducker, G. S. and Rabinowitz, J. D.** (2016). One-Carbon Metabolism in Health and Disease. *Cell Metab* **25**, 27–42.
- Gao, D., Vela, I., Sboner, A., Iaquinta, P. J., Karthaus, W. R., Gopalan, A., Dowling, C., Wanjala, J. N., Undvall, E. A., Arora, V. K., et al.** (2014). Organoid Cultures Derived from Patients with Advanced Prostate Cancer. *Cell* **159**, 176–187.
- Gatenby, R. A. and Gillies, R. J.** (2004). Why do cancers have high aerobic glycolysis? *Nat Rev Cancer* **4**, 891–899.
- Gatenby, R. A. and Gillies, R. J.** (2008). A microenvironmental model of carcinogenesis. *Nat Rev Cancer* **8**, 56–61.

- Gocheva, V., Wang, H.-W., Gadea, B. B., Shree, T., Hunter, K. E., Garfall, A. L., Berman, T. and Joyce, J. A.** (2010). IL-4 induces cathepsin protease activity in tumor-associated macrophages to promote cancer growth and invasion. *Gene Dev* **24**, 241–255.
- Gordon, R. R. and Nelson, P. S.** (2012). Cellular senescence and cancer chemotherapy resistance. *Drug Resist Update* **15**, 123–131.
- Gould, S. E., Junttila, M. R. and Sauvage, F. J. de** (2015). Translational value of mouse models in oncology drug development. *Nat Med* **21**, 431–9.
- Halbrook, C. J., Thurston, G., McCarthy, A., Nelson, B. S., Sajjakulnukit, P., Krall, A. S., Mullen, P. J., Zhang, L., Batra, S., Viale, A., et al.** (2020). Clonal Heterogeneity Supports Mitochondrial Metabolism in Pancreatic Cancer. *Biorxiv* 2020.05.15.098368.
- Hancock, J. F., Magee, A. I., Childs, J. E. and Marshall, C. J.** (1989). All ras proteins are polyisoprenylated but only some are palmitoylated. *Cell* **57**, 1167–1177.
- Heiden, M. G. V., Cantley, L. C. and Thompson, C. B.** (2009). Understanding the Warburg effect: the metabolic requirements of cell proliferation. *Sci New York N Y* **324**, 1029–33.
- Hobson-Gutierrez, S. A. and Carmona-Fontaine, C.** (2018a). The metabolic axis of macrophage and immune cell polarization. *Dis Model Mech* **11**, dmm034462.
- Hobson-Gutierrez, S. A. and Carmona-Fontaine, C.** (2018b). The metabolic axis of macrophage and immune cell polarization. *Dis Model Mech* **11**, dmm034462.
- Jain, M., Nilsson, R., Sharma, S., Madhusudhan, N., Kitami, T., Souza, A. L., Kafri, R., Kirschner, M. W., Clish, C. B. and Mootha, V. K.** (2012). Metabolite Profiling Identifies a Key Role for Glycine in Rapid Cancer Cell Proliferation. *Science* **336**, 1040–1044.
- Junttila, M. R. and Sauvage, F. J. de** (2013). Influence of tumour micro-environment heterogeneity on therapeutic response. *Nature* **501**, 346–354.
- Krall, A. S., Mullen, P. J., Surjono, F., Momcilovic, M., Schmid, E. W., Halbrook, C. J., Thambundit, A., Mittelman, S. D., Lyssiotis, C. A., Shackelford, D. B., et al.** (2020). Asparagine signals mitochondrial respiration and can be targeted to impair tumour growth. *Biorxiv* 2020.03.17.995670.
- Lee, D. C., Sohn, H. A., Park, Z.-Y., Oh, S., Kang, Y. K., Lee, K.-M., Kang, M., Jang, Y. J., Yang, S.-J., Hong, Y. K., et al.** (2015). A lactate-induced response to hypoxia. *Cell* **161**, 595–609.
- Linde, N., Casanova-Acebes, M., Sosa, M. S., Mortha, A., Rahman, A., Farias, E., Harper, K., Tardio, E., Torres, I. R., Jones, J., et al.** (2018). Macrophages orchestrate breast cancer early dissemination and metastasis. *Nat Commun* **9**, 21.

- Lyssiotis, C. A. and Kimmelman, A. C.** (2017). Metabolic Interactions in the Tumor Microenvironment. *Trends Cell Biol* **27**, 863–875.
- Maddocks, O. D. K., Berkers, C. R., Mason, S. M., Zheng, L., Blyth, K., Gottlieb, E. and Vousden, K. H.** (2012). Serine starvation induces stress and p53-dependent metabolic remodelling in cancer cells. *Nature* **493**, 542–546.
- Mazzone, M., Dettori, D., Oliveira, R. L. de, Loges, S., Schmidt, T., Jonckx, B., Tian, Y.-M., Lanahan, A. A., Pollard, P., Almodovar, C. R. de, et al.** (2009). Heterozygous Deficiency of PHD2 Restores Tumor Oxygenation and Inhibits Metastasis via Endothelial Normalization. *Cell* **136**, 839–851.
- Mehta, M. M., Weinberg, S. E. and Chandel, N. S.** (2017). Mitochondrial control of immunity: beyond ATP. *Nat Rev Immunol* **17**, 608–620.
- Merlo, L. M. F., Pepper, J. W., Reid, B. J. and Maley, C. C.** (2006). Cancer as an evolutionary and ecological process. *Nat Rev Cancer* **6**, 924–935.
- Nieto, M. A.** (2013). Epithelial Plasticity: A Common Theme in Embryonic and Cancer Cells. *Science* **342**, 1234850–1234850.
- Olenchock, B. A., Rathmell, J. C. and Heiden, M. G. V.** (2017a). Biochemical Underpinnings of Immune Cell Metabolic Phenotypes. *Immunity* **46**, 703–713.
- Olenchock, B. A., Rathmell, J. C. and Heiden, M. G. V.** (2017b). Biochemical Underpinnings of Immune Cell Metabolic Phenotypes. *Immunity* **46**, 703–713.
- Oshima, K., Zhao, J., Pérez-Durán, P., Brown, J. A., Patiño-Galindo, J. A., Chu, T., Quinn, A., Gunning, T., Belver, L., Ambesi-Impiombato, A., et al.** (2020). Mutational and functional genetics mapping of chemotherapy resistance mechanisms in relapsed acute lymphoblastic leukemia. *Nat Cancer* **1**, 1113–1127.
- Palm, W., Park, Y., Wright, K., Pavlova, N. N., Tuveson, D. A. and Thompson, C. B.** (2015). The Utilization of Extracellular Proteins as Nutrients Is Suppressed by mTORC1. *Cell* **162**, 259–270.
- Pavlova, N. N. and Thompson, C. B.** (2016a). The Emerging Hallmarks of Cancer Metabolism. *Cell Metab* **23**, 27–47.
- Pavlova, N. N. and Thompson, C. B.** (2016b). The Emerging Hallmarks of Cancer Metabolism. *Cell Metabolism* **23**, 27–47.
- Pavlova, N. N., Hui, S., Ghergurovich, J. M., Fan, J., Intlekofer, A. M., White, R. M., Rabinowitz, J. D., Thompson, C. B. and Zhang, J.** (2018). As Extracellular Glutamine Levels Decline, Asparagine Becomes an Essential Amino Acid. *Cell Metab* **27**, 428-438.e5.



- Possemato, R., Marks, K. M., Shaul, Y. D., Pacold, M. E., Kim, D., Birsoy, K., Sethumadhavan, S., Woo, H.-K., Jang, H. G., Jha, A. K., et al.** (2011). Functional genomics reveal that the serine synthesis pathway is essential in breast cancer. *Nature* **476**, 346–350.
- Sakaue-Sawano, A., Kurokawa, H., Morimura, T., Hanyu, A., Hama, H., Osawa, H., Kashiwagi, S., Fukami, K., Miyata, T., Miyoshi, H., et al.** (2008). Visualizing Spatiotemporal Dynamics of Multicellular Cell-Cycle Progression. *Cell* **132**, 487–498.
- Saxton, R. A. and Sabatini, D. M.** (2017). mTOR Signaling in Growth, Metabolism, and Disease. *Cell* **169**, 361–371.
- Son, J., Lyssiotis, C. A., Ying, H., Wang, X., Hua, S., Ligorio, M., Perera, R. M., Ferrone, C. R., Mullarky, E., Shyh-Chang, N., et al.** (2013). Glutamine supports pancreatic cancer growth through a KRAS-regulated metabolic pathway. *Nature* **496**, 101–5.
- Sullivan, L. B., Gui, D. Y., Hosios, A. M., Bush, L. N., Freinkman, E. and Vander Heiden, M. G.** (2015). Supporting Aspartate Biosynthesis Is an Essential Function of Respiration in Proliferating Cells. *Cell* **162**, 552–563.
- Tabassum, D. P. and Polyak, K.** (2015). Tumorigenesis: it takes a village. *Nat Rev Cancer* **15**, 473–483.
- Thomlinson, R. H.** (1977a). Hypoxia and tumours. *J Clin Pathol* **s3-11**, 105.
- Thomlinson, R. H.** (1977b). Hypoxia and tumours. *Journal of clinical pathology* **11**, 105–113.
- van de Wetering, M., Francies, H. E., Francis, J. M., Bounova, G., Iorio, F., Pronk, A., van Houdt, W., van Gorp, J., Taylor-Weiner, A., Kester, L., et al.** (2015). Prospective Derivation of a Living Organoid Biobank of Colorectal Cancer Patients. *Cell* **161**, 933–945.
- Vordermark, D., Shibata, T. and Brown, J. M.** (2001). Green fluorescent protein is a suitable reporter of tumor hypoxia despite an oxygen requirement for chromophore formation. *Neoplasia (New York, N.Y.)* **3**, 527–534.
- Watkins, T. B. K., Lim, E. L., Petkovic, M., Elizalde, S., Birkbak, N. J., Wilson, G. A., Moore, D. A., Grönroos, E., Rowan, A., Dewhurst, S. M., et al.** (2020). Pervasive chromosomal instability and karyotype order in tumour evolution. *Nature* 1–7.
- Weinberg, R. A.** (2013). *The Biology of Cancer*.
- Wenes, M., Shang, M., Di Matteo, M., Goveia, J., Martín-Pérez, R., Serneels, J., Prenen, H., Ghesquière, B., Carmeliet, P. and Mazzone, M.** (2016). Macrophage Metabolism Controls Tumor Blood Vessel Morphogenesis and Metastasis. *Cell Metab* **24**, 701–715.

**Wiseman, H. and Halliwell, B.** (1996). Damage to DNA by reactive oxygen and nitrogen species: Role in inflammatory disease and progression to cancer. *Biochemical Journal* **313**, 17–29.

**Wong, C. C.-L., Gilkes, D. M., Zhang, H., Chen, J., Wei, H., Chaturvedi, P., Fraley, S. I., Wong, C.-M., Khoo, U.-S., Ng, I. O.-L., et al.** (2011). Hypoxia-inducible factor 1 is a master regulator of breast cancer metastatic niche formation. *P Natl Acad Sci Usa* **108**, 16369–74.

**Yano, S., Zhang, Y., Miwa, S., Tome, Y., Hiroshima, Y., Uehara, F., Yamamoto, M., Suetsugu, A., Kishimoto, H., Tazawa, H., et al.** (2014). Spatial-temporal FUCCI imaging of each cell in a tumor demonstrates locational dependence of cell cycle dynamics and chemoresponsiveness. *Cell Cycle* **13**, 2110–2119.

**Zhong, H., Marzo, A. M. D., Laughner, E., Lim, M., Hilton, D. A., Zagzag, D., Buechler, P., Isaacs, W. B., Semenza, G. L. and Simons, J. W.** (1999). Overexpression of hypoxia-inducible factor 1alpha in common human cancers and their metastases. *Cancer Res* **59**, 5830–5.
